# Supplementary material for: Analysis of LINC01314 and miR-96 Expression in Colorectal Cancer Patients via Tissue Microarray-Based Fluorescence In Situ Hybridization
Source: Hindawi journal article supplement (doi:10.1155/2022/5378963), 2022-10-07
Supplement: f1 [file 5378963.f1.pdf]

TMA construction template

|          | 1        | 2        | 3        | 4        | 5        | 6        | 7        | 8            | 9         | 10        | 11           |
|----------|----------|----------|----------|----------|----------|----------|----------|--------------|-----------|-----------|--------------|
| <b>A</b> | Tumor 1  | tumor 11 | Tumor 21 | Tumor 31 | Tumor 41 | Tumor 51 | Tumor 61 | Tumor 71     | Normal 1  | Normal 11 | Normal 13    |
| <b>B</b> | Tumor 2  | tumor 12 | Tumor 22 | Tumor 32 | Tumor 42 | Tumor 52 | Tumor 62 | Tumor 72     | Normal 2  | Normal 12 | Normal 14    |
| <b>C</b> | Tumor 3  | tumor 13 | Tumor 23 | Tumor 33 | Tumor 43 | Tumor 53 | Tumor 63 | Tumor 73     | Normal 3  | Normal 13 | Normal 15    |
| <b>D</b> | Tumor 4  | tumor 14 | Tumor 24 | Tumor 34 | Tumor 44 | Tumor 54 | Tumor 64 | Tumor 74     | Normal 4  | Normal 14 | Normal 16    |
| <b>E</b> | Tumor 5  | tumor 15 | Tumor 25 | Tumor 35 | Tumor 45 | Tumor 55 | Tumor 65 | Tumor 75     | Normal 5  | Normal 15 | Normal 17    |
| <b>F</b> | Tumor 6  | tumor 16 | Tumor 26 | Tumor 36 | Tumor 46 | Tumor 56 | Tumor 66 | Tumor 75-1   | Normal 6  | Normal 16 | Normal 18    |
| <b>G</b> | Tumor 7  | tumor 17 | Tumor 27 | Tumor 37 | Tumor 47 | Tumor 57 | Tumor 67 | Tumor 75-2   | Normal 7  | Normal 17 | Normal 19    |
| <b>H</b> | Tumor 8  | tumor 18 | Tumor 28 | Tumor 38 | Tumor 48 | Tumor 58 | Tumor 68 | Tumor 76-1   | Normal 8  | Normal 18 | Normal 20    |
| <b>I</b> | Tumor 9  | tumor 19 | Tumor 29 | Tumor 39 | Tumor 49 | Tumor 59 | Tumor 69 | Tumor 76-2   | Normal 9  | Normal 19 | Locate Point |
| <b>J</b> | Tumor 10 | tumor 20 | Tumor 30 | Tumor 40 | Tumor 50 | Tumor 60 | Tumor 70 | Locate Point | Normal 10 | Normal 20 | Locate Point |
